# Supplementary material
Source: PubMed Central journal article supplement (PMC4326876)
Supplement: acel0013-0092-sd1.pdf [file acel0013-0092-sd1.pdf]

### Supplemental Table 1

#### Muscle Isometric Twitch Properties of WT and MuRF1 KO

|        | Twitch Peak<br>Tension (g) | Time to Peak<br>Tension (ms) | Half Relaxation<br>Time (ms) |
|--------|----------------------------|------------------------------|------------------------------|
| 8m WT  | 54.7 ±4.5                  | 12.71 ± .48                  | 8.30 ± .49                   |
| 8m KO  | 51.9 ±3.5                  | 12.51 ± .52                  | 7.34 ± .52                   |
| 12m WT | 68.2 ±5.0                  | 10.67 ± .37                  | 9.07 ± .69                   |
| 12m KO | 69.0 ±8.3                  | 11.66 ± .54                  | 7.84 ± .64                   |
| 18m WT | 63.6 ±5.2                  | 11.41 ± .56                  | 9.88 ± .90                   |
| 18m KO | 72.3 ±3.5                  | 11.91 ± .28                  | 9.56 ± .37                   |
| 24m WT | 65.6±2.7                   | 21.81 ± .67 <sup>α</sup>     | 13.25 ± .85 <sup>α</sup>     |
| 24m KO | 65.0±9.3                   | 21.59 ± 2.5 <sup>α</sup>     | 13.41 ± 1.2 <sup>α</sup>     |

Values are expressed as mean ± SEM. Statistical significance is set at p<0.05; α indicates significant difference between ages within a genotype.

# Supplemental Figure 1

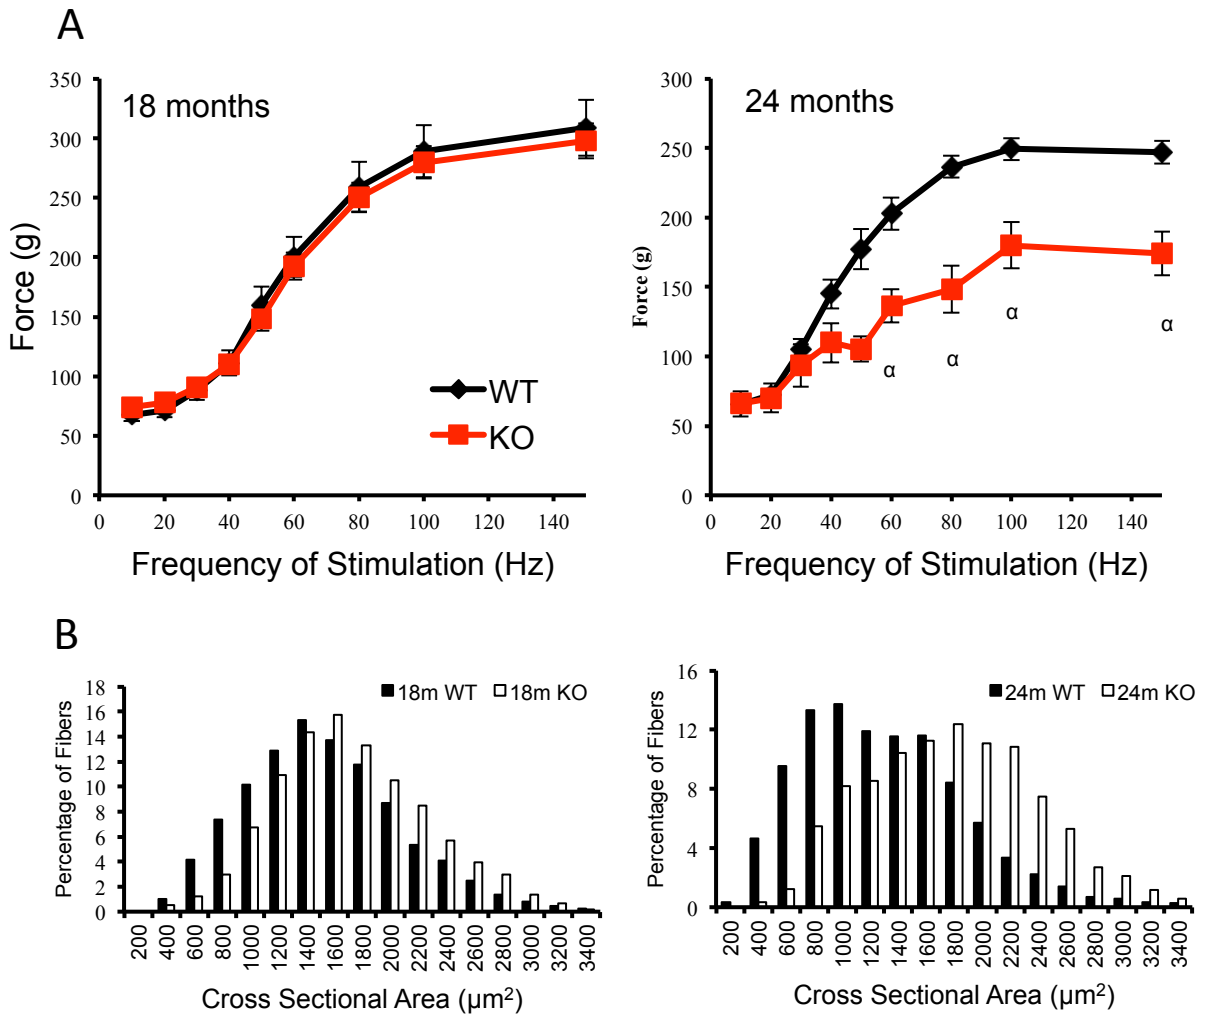

(A) Force-Frequency distribution and (B) distribution of fiber cross-sectional areas of the gastrocnemius muscle of wild type (WT) and MuRF1 KO mice at 18 and 24 months of age. Data are mean  $\pm$  SEM,  $n \geq 5$  mice per group. Statistical significance at  $p < 0.05$ ,  $\alpha$  indicates significant difference due to genotype at a specific age.

## Supplemental Figure 2

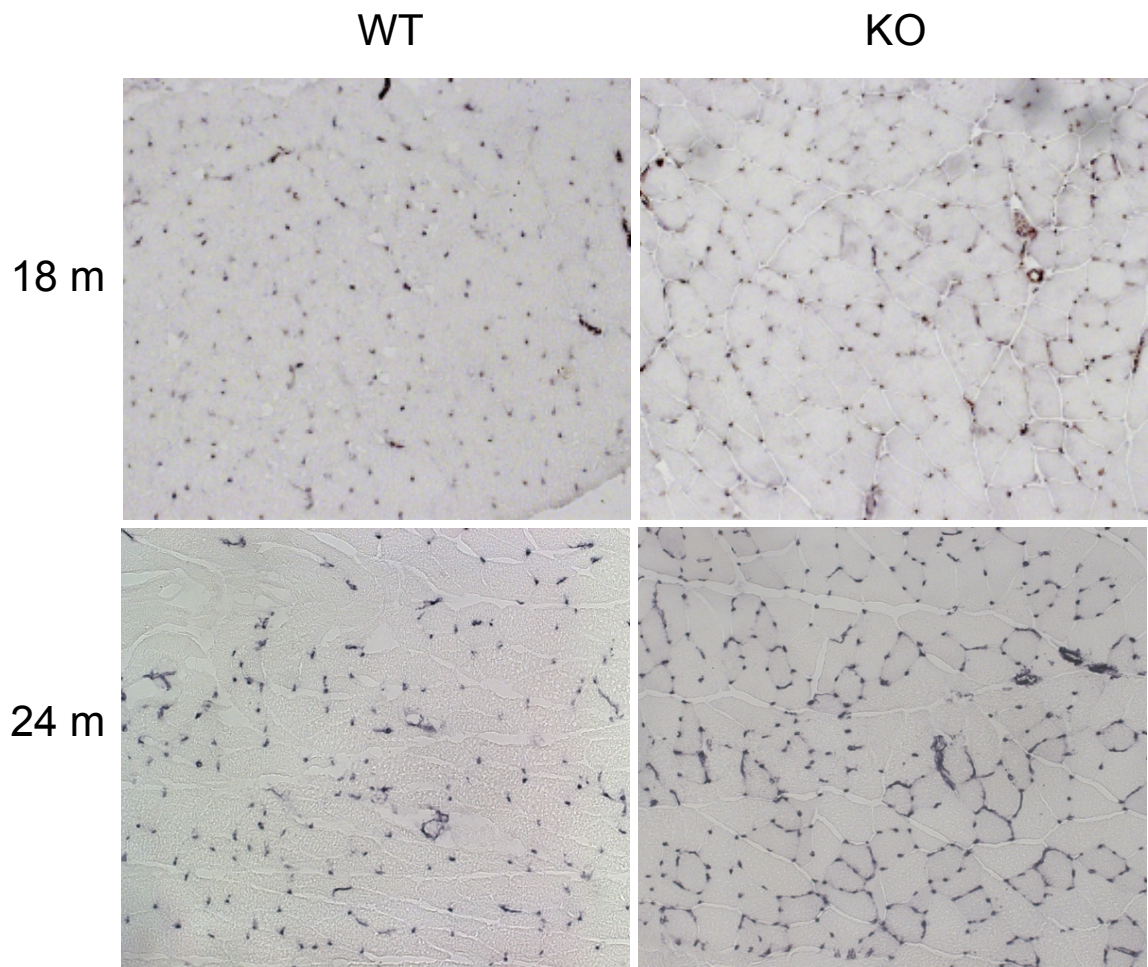

Representative cross-sections of the gastrocnemius muscle of 18 and 24m old WT and KO mice stained for CD31, an endothelial marker, to identify capillaries.

# Supplement Figure 3

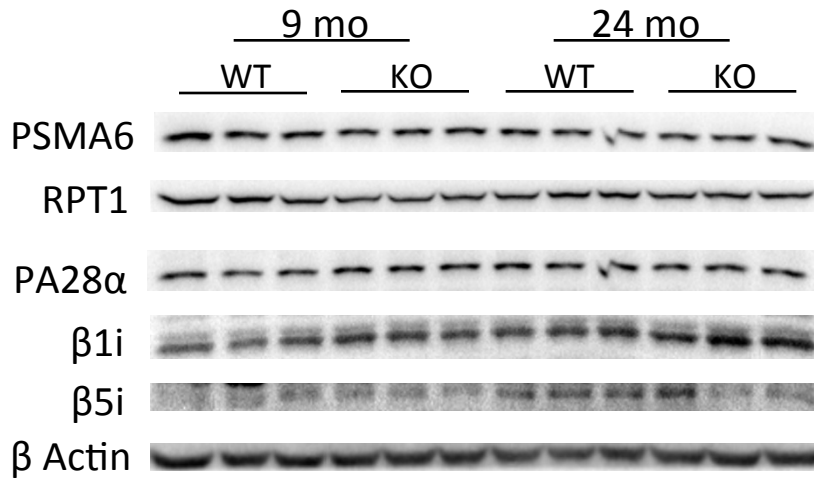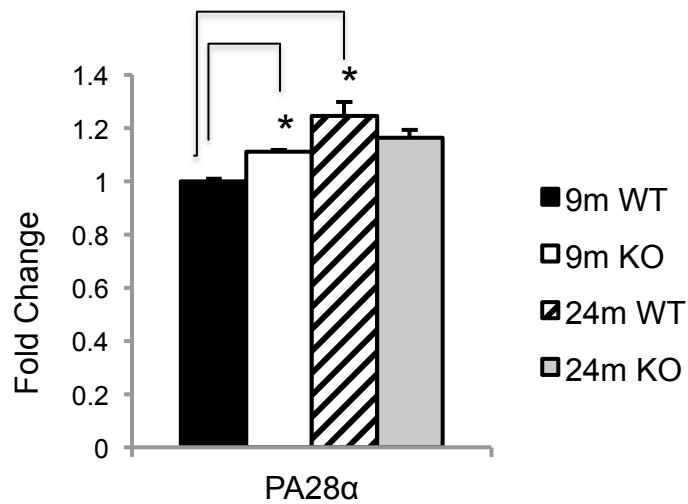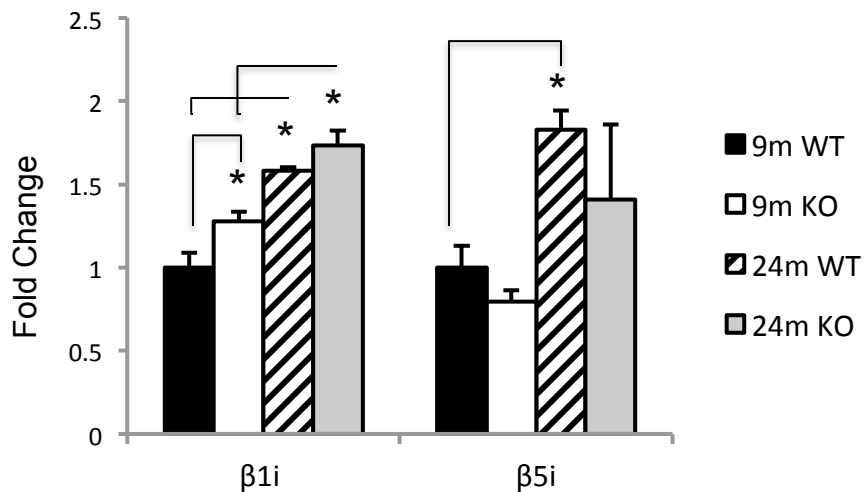

Means  $\pm$  SEM (n=3-4 per group) are expressed as a fold change relative to the 9m WT mean. Statistical significance was set at  $p < 0.05$  and determined using a two-way ANOVA and Tukey's post hoc test for multiple comparisons.

# Supplement Figure 4

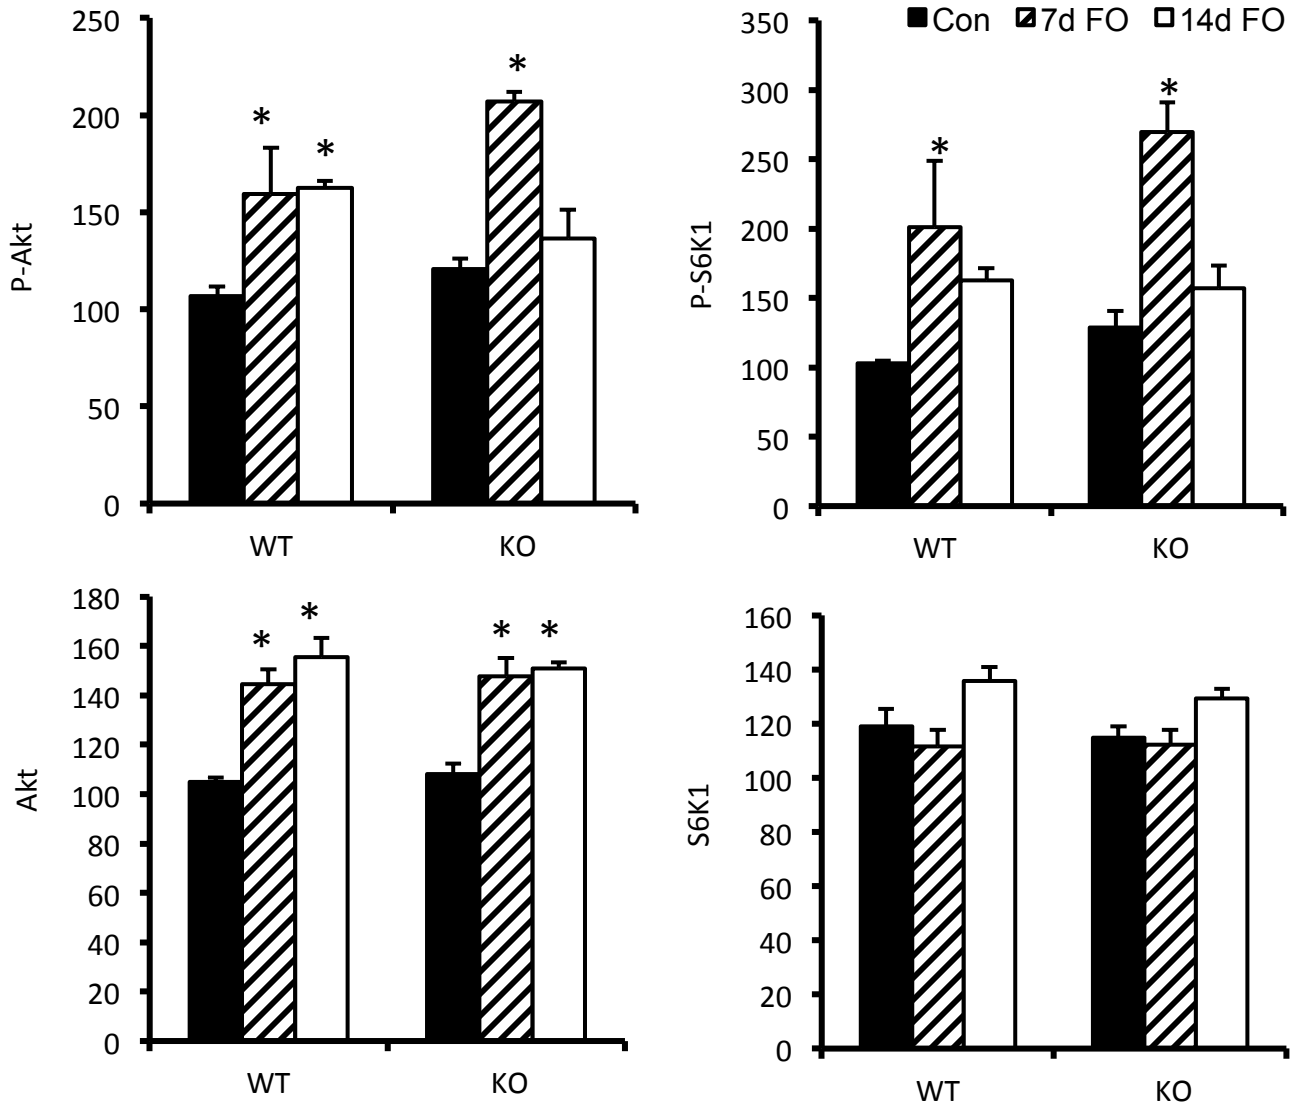

Quantification (n=4) of the phosphorylation and total protein levels of Akt and S6K1 in the plantaris muscle of old (18-20 m) WT and KO mice following no treatment (Con, black) and FO for 7 (hatched) and 14 (white) days. Data are mean  $\pm$  SEM. Statistical significance was set at  $p < 0.05$  and determined using a two-way ANOVA for growth and a one-way ANOVA for protein expression.
